# Supplementary material for: A machine learning-based chemoproteomic approach to identify drug targets and binding sites in complex proteomes
Source: PubMed Central journal article supplement (PMC7442650; doi:10.1038/s41467-020-18071-x), 2020-08-21
Supplement: 41467_2020_18071_MOESM3_ESM.pdf [file 41467_2020_18071_MOESM3_ESM.pdf]

## Description of Additional Supplementary Files

**Title: Supplementary Data 1.**

**Description:** LiP-SMap experiment of HeLa cell lysates treated with rapamycin at a concentration of 2  $\mu$ M.

**Title: Supplementary Data 2.**

**Description:** LiP-SMap experiment of HeLa live cell cultures treated with rapamycin at a concentration of 2  $\mu$ M.

**Title: Supplementary Data 3.**

**Description:** LiP-Scores obtained after analysis with the LiP-Quant machine learning-based classifier of HeLa cell lysates treated with the following compounds: rapamycin, FK506, calyculin A, fostriecin, selumetinib, staurosporine.

**Title: Supplementary Data 4.**

**Description:** Consistency of LiP-Quant scores and differential peptide abundance intensities with rapamycin and FK506.

**Title: Supplementary Data 5.**

**Description:** LiP scores obtained after analysis with the LiP-Quant machine learning-based classifier of *S.cerevisiae* cell lysates from *wild type* and  $\Delta$ *Frb1* mutant strains.

**Title: Supplementary Data 6.**

**Description:** KinHub kinase reference database (<http://www.kinhub.org>).

**Title: Supplementary Data 7.**

**Description:** Benchmarking of LiP-Quant and Deep-LiP-Quant with TPP parametric (Savitski, 2014) and TPP non-parametric analysis (Childs, 2019).

**Title: Supplementary Data 8.**

**Description:** Deep-LiP-Quant experiment of HeLa cell lysates treated with staurosporine and analyzed with a 4-hours LC gradient.

**Title: Supplementary Data 9.**

**Description:** LiP-Scores obtained after analysis with the LiP-Quant machine learning-based classifier of HeLa membrane-enriched fractions.

**Title: Supplementary Data 10.**

**Description:** Single concentration LiP-Quant rapamycin control experiment of HeLa cell lysates treated with mild detergent during cell lysis.

**Title: Supplementary Data 11.**

**Description:** Nuanced specificity in target binding of fostriecin and calyculin A.

**Title: Supplementary Data 12.**

**Description:** Predictions of binding sites with center of mass of high confidence LiP peptides.

**Title: Supplementary Data 13.**

**Description:** LiP-Scores obtained after analysis with the LiP-Quant machine learning-based classifier of *Botrytis cinerea* cell lysates treated with the compound BAYE-004.

**Title: Supplementary Data 14.**

**Description:** Peptide Frequency Library (PFL) that identifies proteins that are common contaminants in LiP-Quant experiments.

**Title: Supplementary Data 15.**

**Description:** Peptide ranking for calculation of drug binding sites in the LiP-Quant experiments reported in this manuscript.

**Title: Supplementary Data 16.**

**Description:** List of reagents or resources used in this manuscript.
